# Supplementary material for: Comparative Proteomics and Genome-Wide Druggability Analyses Prioritized Promising Therapeutic Targets against Drug-Resistant Leishmania tropica
Source: MDPI journal article supplement (doi:10.3390/microorganisms11010228), 2023-01-16
Supplement: s1 [file s1]

**Table S1:** The prediction of ADME parameters, pharmacokinetic properties, druglike nature, and medicinal chemistry friendliness of top 10 lead compounds predicted potent inhibitors against UGPase target.

| Serial No. | Compounds (MolPort IDs) | H-Bond Acceptors | H-Bond Donors | TPSA (Å <sup>2</sup> ) | Consensus Log P <sub>o/w</sub> | Molar Refractivity | GI Absorption | Log S                       | BBB Permeant | P-gp Substrate | Log Kp (skin permeation) cm/s | Drug likeness based on Lipinski rule | Bioavailability Score | PAINS (alert) | Brenk (alert)      | Synthetic accessibility |
|------------|-------------------------|------------------|---------------|------------------------|--------------------------------|--------------------|---------------|-----------------------------|--------------|----------------|-------------------------------|--------------------------------------|-----------------------|---------------|--------------------|-------------------------|
| C1         | MolPort-002-619-190     | 3                | 0             | 95.45                  | 6.74                           | 139.50             | low           | -7.48<br>Poorly soluble     | No           | Yes            | -3.28 cm/s                    | Yes; 1 violation: MLOGP>4.15         | 0.55                  | 0 alert       | 0 alert            | 4.17                    |
| C2         | MolPort-000-451-699     | 6                | 1             | 75.8                   | 4.47                           | 132.78             | High          | -5.87<br>Moderately soluble | No           | Yes            | -5.36 cm/s                    | Yes; 0 violation                     | 0.55                  | 0 alert       | 1 alert: mannich_A | 4.29                    |
| C3         | MolPort-000-730-162     | 4                | 1             | 88.17                  | 5.3                            | 129.26             | High          | -6.24<br>Poorly soluble     | No           | Yes            | -4.88 cm/s                    | Yes; 0 violation                     | 0.55                  | 0 alert       | 0 alert            | 4.33                    |
| C4         | MolPort-000-451-697     | 7                | 1             | 85.03                  | 3.63                           | 129.05             | High          | -5.11<br>Poorly soluble     | No           | Yes            | -6.23 cm/s                    | Yes; 0 violation                     | 0.55                  | 0 alert       | 1 alert: mannich_A | 4.33                    |
| C5         | MolPort-000-451-711     | 7                | 1             | 66.15                  | 4.65                           | 141.75             | High          | -6.13<br>Poorly soluble     | Yes          | Yes            | -5.46cm/s                     | Yes; 0 violation                     | 0.55                  | 0 alert       | 1 alert: mannich_A | 4.57                    |
| C6         | MolPort-000-451-749     | 7                | 1             | 89.21                  | 2.86                           | 111.93             | High          | -3.09<br>Poorly soluble     | No           | Yes            | -7.69 cm/s                    | Yes; 0 violation                     | 0.55                  | 0 alert       | 0 alert            | 3.71                    |
| C7         | MolPort-002-611-137     | 5                | 0             | 68.46                  | 3.22                           | 99.43              | High          | -4.33<br>Poorly soluble     | No           | Yes            | -5.81 cm/s                    | Yes; 0 violation                     | 0.55                  | 0 alert       | 0 alert            | 3.65                    |
| C8         | MolPort-002-619-190     | 3                | 0             | 95.45                  | 6.74                           | 139.5              | Low           | -7.48<br>Poorly soluble     | No           | Yes            | -3.28 cm/s                    | Yes; 1 violation: MLOGP>4.15         | 0.55                  | 0 alert       | 0 alert            | 4.17                    |
| C9         | MolPort-002-608-446     | 3                | 0             | 95.45                  | 6.47                           | 134.69             | Low           | -7.17<br>Poorly soluble     | No           | Yes            | -3.53 cm/s                    | Yes; 1 violation: MLOGP>4.15         | 0.55                  | 0 alert       | 0 alert            | 4.04                    |
| C10        | MolPort-000-451-699     | 6                | 1             | 75.80                  | 4.47                           | 132.78             | High          | -5.87<br>Moderately soluble | No           | Yes            | -5.36 cm/s                    | Yes; 0 violation                     | 0.55                  | 0 alert       | 1 alert: mannich_A | 4.29                    |

**Table S2:** The prediction of ADME parameters, pharmacokinetic properties, druglike nature, and medicinal chemistry friendliness of top 10 lead compounds predicted potent inhibitors against PCNA target.

| Serial No. | Compounds (MolPort IDs) | H-Bond Acceptors | H-Bond Donors | TPS A (Å <sup>2</sup> ) | Conse nsus Log Po/w | Molar Refrac tivity | GI Absor ption | Log S                    | BBB Perme ant | P-gp Sub strat e | Log Kp (skin permeation ) cm/s | Drug likeness based on Lipinski rule | Bioavail ability Score | PAINS (alert) | Brenk (alert)                                                  | Synthet ic accessib ility |
|------------|-------------------------|------------------|---------------|-------------------------|---------------------|---------------------|----------------|--------------------------|---------------|------------------|--------------------------------|--------------------------------------|------------------------|---------------|----------------------------------------------------------------|---------------------------|
| C1         | MolPort-001-741-093     | 10               | 3             | 159.05                  | -0.03               | 101.59              | Low            | -2.30 soluble            | No            | No               | -9.07 cm/s                     | Yes; 0 violation                     | 0.55                   | 0 alert       | 1 alert: cumarine                                              | 5.38                      |
| C2         | MolPort-000-700-443     | 6                | 3             | 107.02                  | 0.66                | 83.82               | High           | -4.61 Moderately soluble | No            | No               | -6.11 cm/s                     | Yes; 0 violation                     | 0.55                   | 0 alert       | 0 alert                                                        | 3.33                      |
| C3         | MolPort-047-116-128     | 10               | 5             | 194.76                  | -1.75               | 78.81               | Low            | -0.81 Very soluble       | No            | No               | -9.40 cm/s                     | Yes; 1 violation: NorO>10            | 0.55                   | 0 alert       | 3 alerts: aldehyde, nitro_group , oxygen-nitrogen_si ngle_bond | 3.96                      |
| C4         | MolPort-039-345-350     | 8                | 4             | 129.59                  | 0.64                | 94.14               | High           | -2.62 soluble            | No            | No               | -8.28 cm/s                     | Yes; 0 violation                     | 0.55                   | 0 alert       | 2 alerts: cumarine, polycyclic_ aromatic_h ydrocarbon _3       | 4.90                      |
| C5         | MolPort-002-525-976     | 11               | 8             | 189.53                  | -3.64               | 68.16               | High           | 1.44 highly soluble      | No            | Yes              | -11.92 cm/s                    | No; 2 violations: NorO>10, NHorOH>5  | 0.17                   | 0 alert       | 0 alert                                                        | 5.35                      |
| C6         | MolPort-046-836-802     | 13               | 8             | 215.83                  | -3.94               | 83.83               | Low            | 1.82 highly soluble      | No            | Yes              | -13.00 cm/s                    | No; 2 violations: NorO>10, NHorOH>5  | 0.17                   | 0 alert       | 1 alert: aldehyde                                              | 5.68                      |
| C7         | MolPort-020-232-354     | 5                | 3             | 87.14                   | 2.02                | 107.97              | High           | -3.03 soluble            | No            | Yes              | -7.57 cm/s                     | Yes; 0 violation                     | 0.55                   | 0 alert       | 0 alert                                                        | 3.37                      |

|            |                     |    |   |        |      |        |      |                             |    |     |            |                               |      |                       |         |      |
|------------|---------------------|----|---|--------|------|--------|------|-----------------------------|----|-----|------------|-------------------------------|------|-----------------------|---------|------|
| <b>C8</b>  | MolPort-020-232-872 | 5  | 4 | 99.17  | 0.77 | 89.60  | High | -1.94<br>Very soluble       | No | Yes | -8.03 cm/s | Yes; 0 violation              | 0.55 | 0 alert               | 0 alert | 2.84 |
| <b>C9</b>  | MolPort-004-860-220 | 6  | 2 | 81.08  | 3.08 | 123.15 | High | -5.04<br>moderately soluble | No | No  | -6.10 cm/s | Yes; 0 violation              | 0.55 | 0 alert               | 0 alert | 3.58 |
| <b>C10</b> | MolPort-044-727-363 | 10 | 6 | 173.98 | 0.18 | 102.91 | Low  | -3.18<br>soluble            | No | Yes | -8.29 cm/s | Yes; 1 violation:<br>NHorOH>5 | 0.55 | 1 alert:<br>quinone_A | 0 alert | 5.01 |
