# Supplementary material for: Comparative Proteomics and Genome-Wide Druggability Analyses Prioritized Promising Therapeutic Targets against Drug-Resistant Leishmania tropica
Source: MDPI journal article supplement (doi:10.3390/microorganisms11010228), 2023-01-16
Supplement: s1 [file s1]

**Figure S1:** Docking results of top ten hit molecules in the Pharmit resource showing 3D images of the molecular interaction of compounds C1-C10 with the LtUGPase.

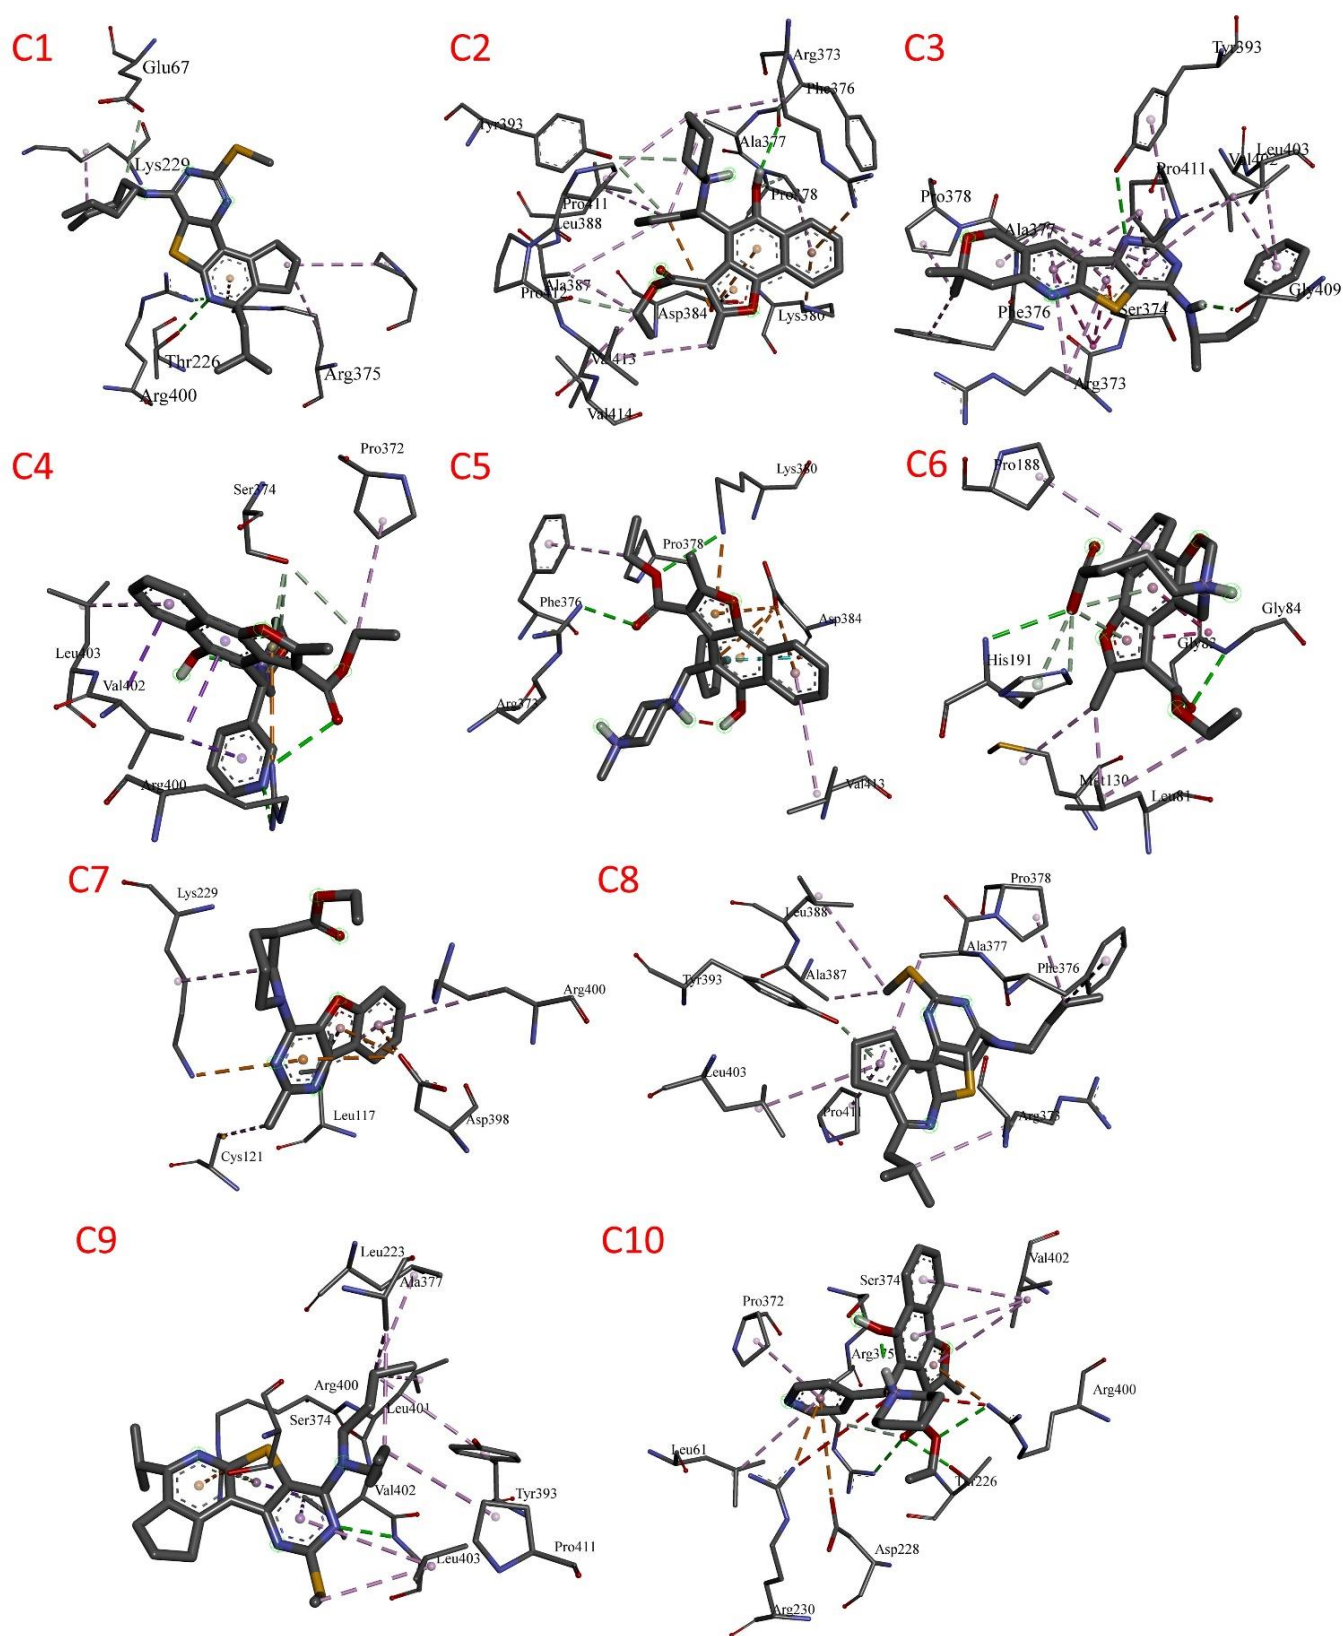

**Figure S2:** Docking results of top ten hit molecules in the Pharmit resource showing 2D images of the molecular interaction of compounds C1-C10 with the LtUGPase.

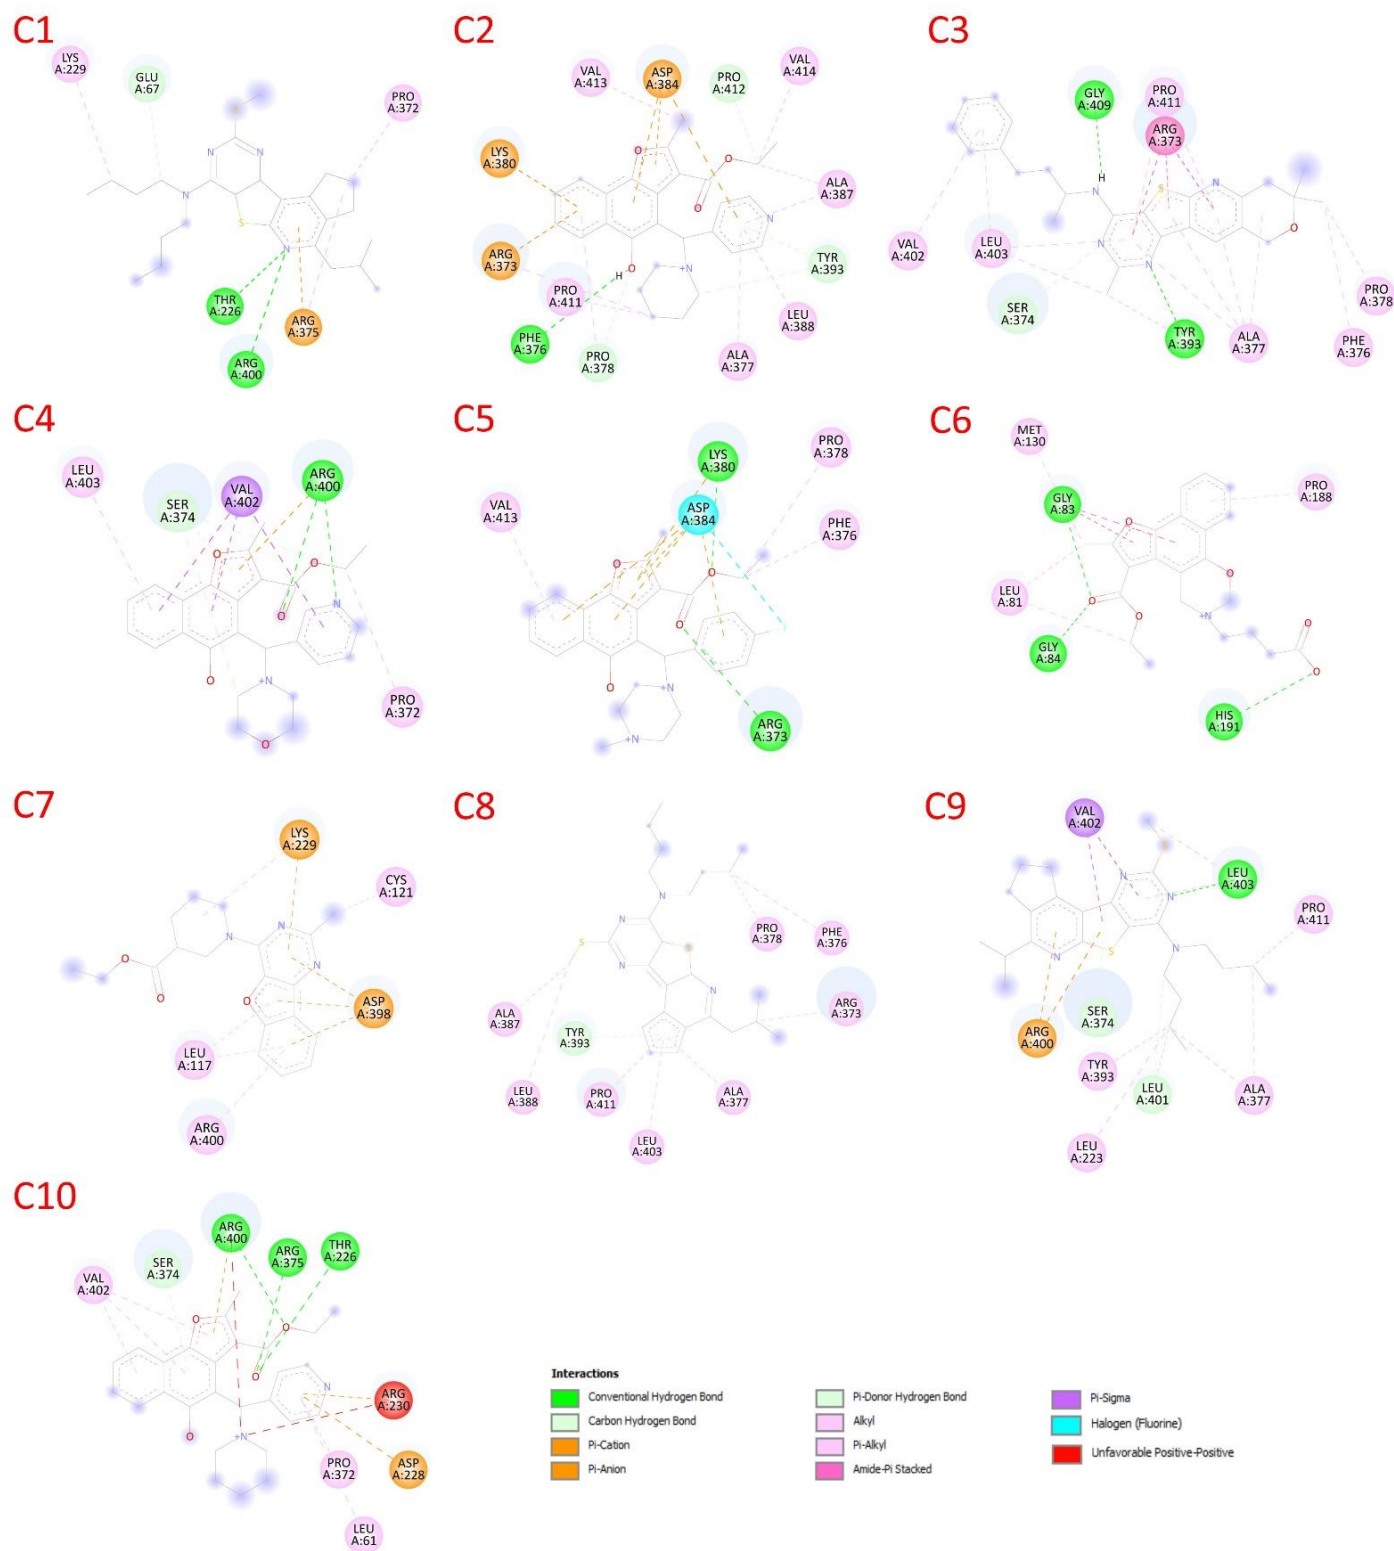

**Figure S3:** Docking results of top ten hit molecules in the Pharmit resource showing 3D images of the molecular interaction of compounds C1-C10 with the LtPCNA.

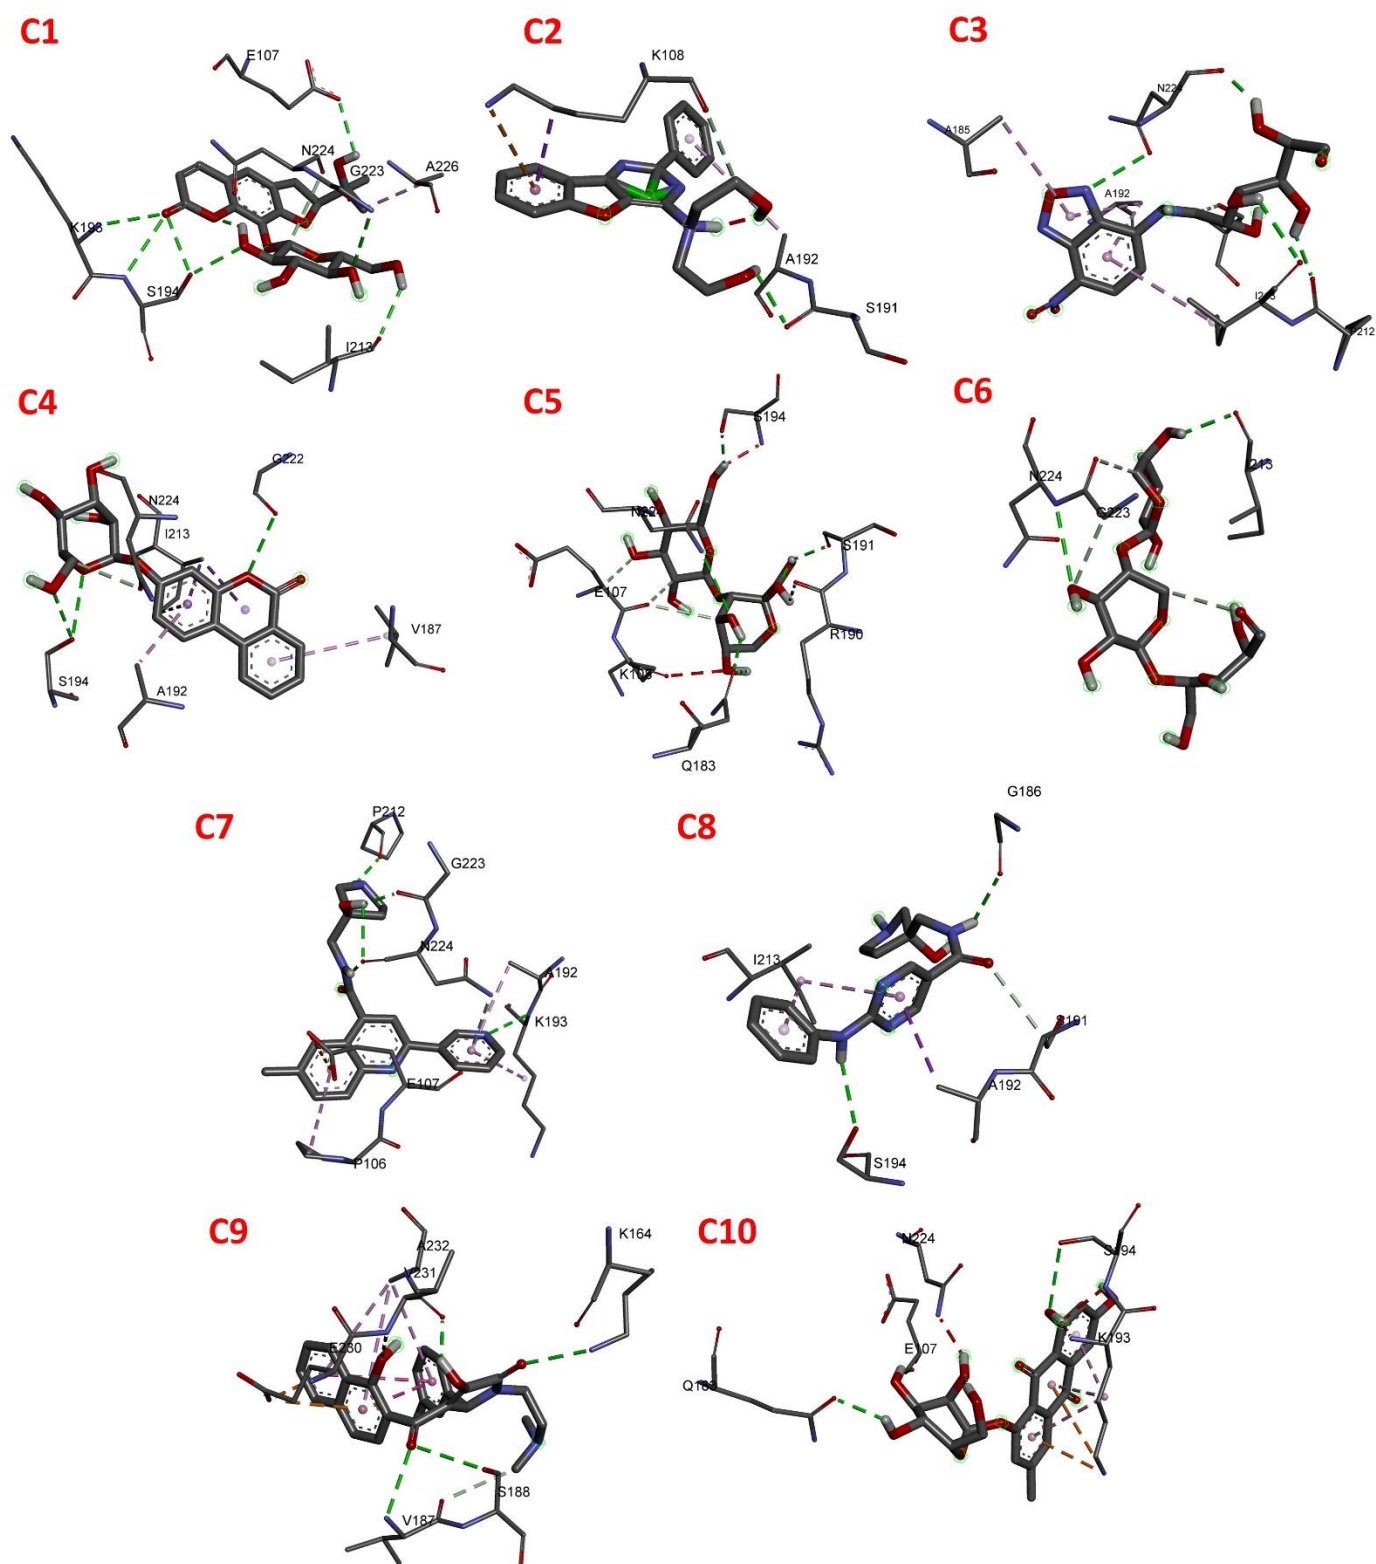

**Figure S4:** Docking results of top ten hit molecules in the Pharmit resource showing 2D images of the molecular interaction of compounds C1-C10 with the LtPCNA.

**C1**

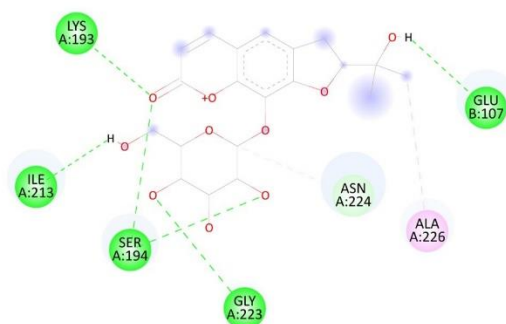

**C2**

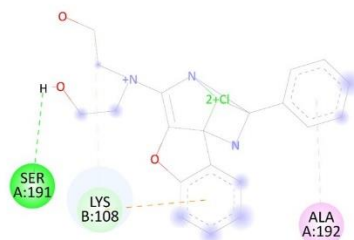

**C3**

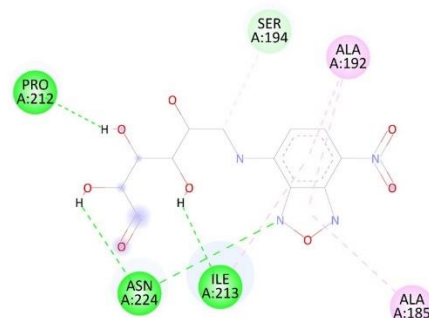

**C4**

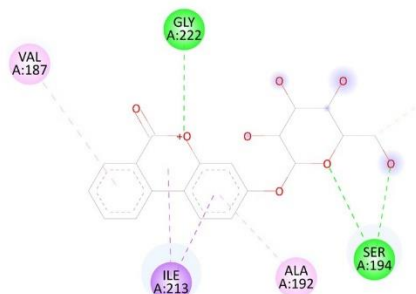

**C5**

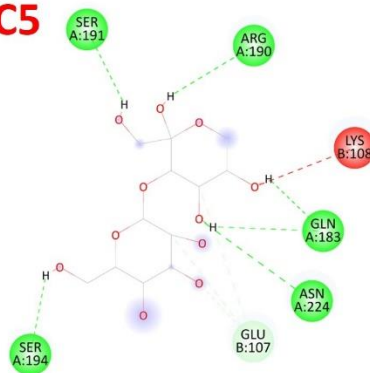

**C6**

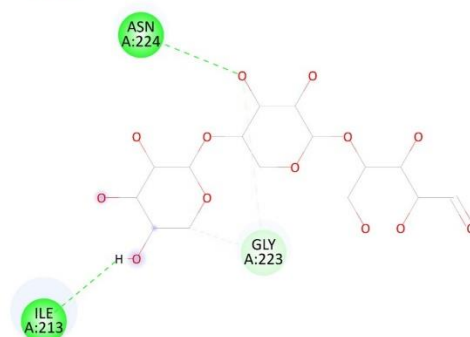

**C8**

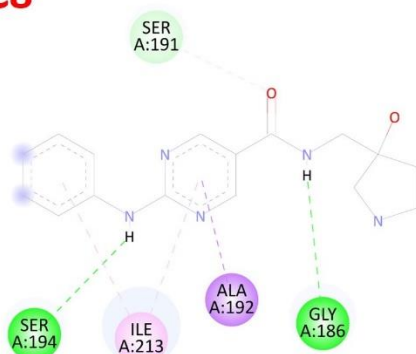

**C9**

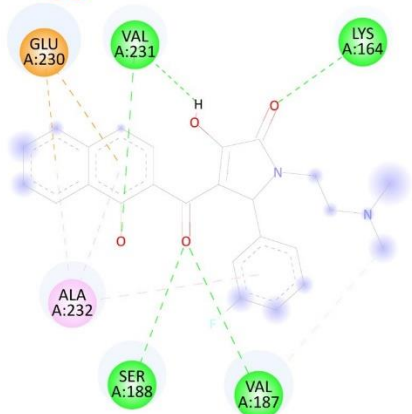

**C10**

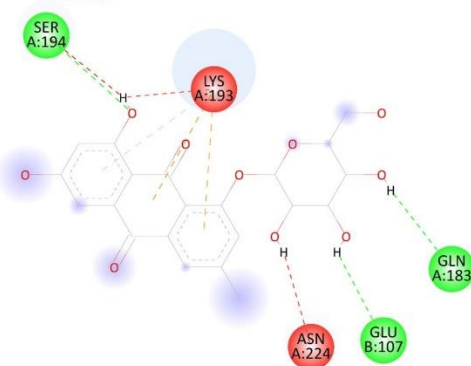

#### Interactions

- Conventional Hydrogen Bond
- Carbon Hydrogen Bond
- Pi-Cation
- Pi-Anion

- Pi-Donor Hydrogen Bond
- Alkyl
- Pi-Alkyl

- Pi-Sigma
- Halogen (Fluorine)
- Unfavorable Positive-Positive

- Unfavorable Donor-Donor
- Unfavorable Acceptor-Acceptor
